# Supplementary material for: Multilevel Approach for the Treatment of Giardiasis by Targeting Arginine Deiminase
Source: MDPI journal article supplement (doi:10.3390/ijms22179491), 2021-08-31
Supplement: s1 [file s1]

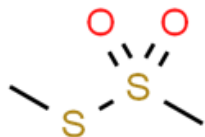

MMTS  
PubChem CID: 18064

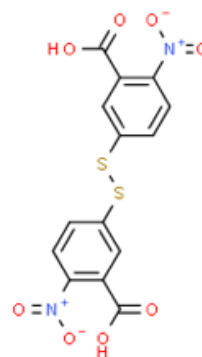

DTNB  
PubChem CID: 6254

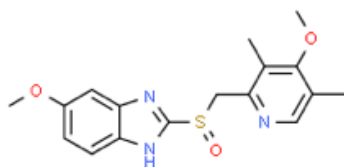

Omeprazole  
PubChem CID: 4594

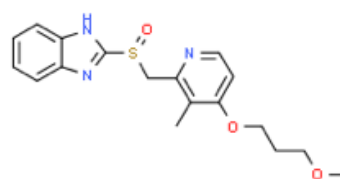

Rabeprazole  
PubChem CID: 5029

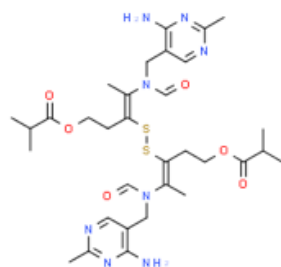

Sulbutiamine  
PubChem CID: 20055424

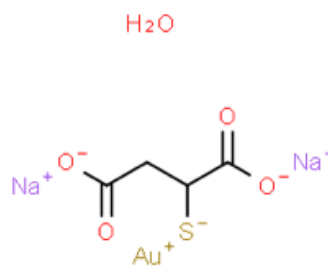

Aurothiomalate  
PubChem CID: 134577

Figure S1. Studied molecules 2D chemical structure. The structures were obtained from Chemspider free chemical structure database ([www.chemspider.com](http://www.chemspider.com)).

|                |                                                                  |    |
|----------------|------------------------------------------------------------------|----|
| XP_001705755.1 | MTDFSKDKEKLAQATQGGENERAEIVVVHLPQGTS-FLTSLNPEGNLLEEPICPDELRRD     | 59 |
| EST48861.1     | -----MQIKPQQHSEHATARTILVYEP ELAV-FVNCLHPAGSLYECPI NPESALAQ       | 50 |
| WP_011027247.1 | --MTSNESA VSQALGVHSEVGR LRKVLVCSPLG LAHRRLTPTNSDELLFDDVMVVENAQRD | 58 |
| WP_012482189.1 | -----MRGFGVHSEVGKLR TVMVCRPSLAHQRLTPANCHDLLFDDVLVWHEAQKD         | 50 |
| KFL10416.1     | -----MSTEKTKLGVHSEAGKLRKVMVCSPLG LAHQRLTPSNCDELLFDDVIWVWNAQKR    | 54 |
| KHL72821.1     | -----MSAEKQKYGVHSEAGKLRKVMVCA PLG LAHKRLTPSNCDELLFDDVIWVDQAKRD   | 54 |
| AAD55448.1     | ---MSVFDSKFKGIHVYSEIGELETVLVHEPGKEIDYITPARLDELLFSAILES HDARKE    | 57 |
| BAQ54605.1     | ---MSVFDSKFKGIHVYSEIGELESVLVHEPGREIDYITPARLDELLFSAILES HDARKE    | 57 |
| AGS66837.1     | -----MEEEYLNPI NIFSEIGRLKKVLLHRPGEELENLTPLIMKNFLFDDIPYLKVARQE    | 55 |
| NP_813907.1    | -----MSHPINVFSEIGKLTVM LHRPGKELENLMPDYLERLLFDDIPFLEKAQAE         | 51 |
| ARW56296.1     | -----MTTPIHVYSEIGPLKTVMLKRP GRELENLTPEYLERLLFDDIPFPAVQKE         | 51 |
| CAA04682.1     | -----MTSPIHVNSEIGKLTVLLKRP GKEVENITPDIMYRLLFDDIPYLP TIQKE        | 51 |
|                | . * . : : * : * . :                                              |    |

|                |                                                                |     |
|----------------|----------------------------------------------------------------|-----|
| XP_001705755.1 | HEGFQAVLKEKGC RVMPYDVLSEAS--P--AEREVLMDQAMASLKYELHATGARITPKM   | 115 |
| EST48861.1     | HRNFQKVLQSHGINVLEVECI LRSTNTDP--AQRLELEEYAAQQLTY-----IGP       | 98  |
| WP_011027247.1 | HAAFVGE LRRRGVEVVELHDLLAQIMALP--EARAWLLDRKITANQ-----VGIGL----  | 107 |
| WP_012482189.1 | HFDFVLKMQERGVEVLELHDLLGQTLANQ--QARDFLLDRRITPNV-----LGSQI----   | 99  |
| KFL10416.1     | HFDFVTKMRERGI DVLEMHNLTTETIQNP--EALKWILDRKITADS-----VGLGL----  | 103 |
| KHL72821.1     | HFDFVTKMRERGV DVLEMHNLTDIVQNK--DA LKWILDRKITPDT-----VGVLG----  | 103 |
| AAD55448.1     | HKEFVAELKKRGIN VVELVDLIVETYDLASKEAKEKLL EEFLDDSAP---VLSDEH---- | 110 |
| BAQ54605.1     | HKQFVAELKANDIN VVELIDLVAETYDLASQEA KDKLIEEFLEDSEP---VLSEEH---- | 110 |
| AGS66837.1     | HEVFNILKDNSVEIEYVEDLVSEVLASS-VALKNKFISQFILEAEI----KTDGV----    | 106 |
| NP_813907.1    | HDFAELLRSKDI EVVYLEDLAAEALINE--EVRRQFIDQFLEANI-----RSESA----   | 101 |
| ARW56296.1     | HDQFAETLKQQGA EVLYLEKLTAEALDDA--LVREQFIDELLTESKA----DINGA----  | 101 |
| CAA04682.1     | HDQFAQTLRDNGVEVLYLENLAAEAIDAG--DVKEAFLDKMLNESH I----KSPQV----  | 101 |
|                | * * : : . : . : . :                                            |     |

|                |                                                                  |     |
|----------------|------------------------------------------------------------------|-----|
| XP_001705755.1 | KYCVSDEYKRKVL SALST-RNLVDVILSEPV IHLAPGVRNT-----ALVTNSVEIHD      | 166 |
| EST48861.1     | EEYASDDYKMKV IKSLSPE-SLVKVLITAPV VYLEATTNNT-----NVITTKTEMRA      | 149 |
| WP_011027247.1 | -----IDAARAYLET LSP-RELAEYLVGGLATSDLPEDFRSPHLALARESTGAREYLMPP    | 161 |
| WP_012482189.1 | -----AEAMRPWLDEMPA-AQLAAFMIGTAISDLPEVRAKSL---MLSALPEDFVIPP       | 150 |
| KFL10416.1     | -----TSELRSWLESLEP-RKLAEY LIGGVAADDLPASEGADILKMYREYLGHSSFLLPP    | 157 |
| KHL72821.1     | -----TNEVRSWLEGLEP-RHLAEFLIGGVAGQDLPQSEGADVVKMYNDYLGHSSFILPP     | 157 |
| AAD55448.1     | -----RAAVKKFLQS QKSTRSLVEYMIAGITKHDLKI-----ESDLELIVDP            | 152 |
| BAQ54605.1     | -----KVVVRNFLKAKKTSRELVEIMMAGITKYDLGI-----EADHELIVDP             | 152 |
| AGS66837.1     | -----INILKDYFSNLTV-DNMVSKMISGVAREELKDCEF-SLDDWV---NGSSLFVIDP     | 156 |
| NP_813907.1    | -----KEKVRELMLEID DNEELIQAIAGIQKQELPKYEQEFLTDMV---EADYPFII DP    | 153 |
| ARW56296.1     | -----YDRLKEFLLT FDDA-DSMVEQVMGSI RKNELEREKSKSHLHELM---EDHYPFYLDP | 152 |
| CAA04682.1     | -----QAALKDYLI SMAT-LDMVEKIMAGVRTNEIDIKSKALIDVSA---DDDYPFYMDP    | 152 |
|                | : : : :                                                          |     |

|                |                                                               |     |
|----------------|---------------------------------------------------------------|-----|
| XP_001705755.1 | SNNMVFMRDQQITTRRGIVMGQFQAPQRRREQVLALIFWKRLGARVVGD-----        | 215 |
| EST48861.1     | LGNIVFTRDQQIT TAKGVVIGNFSAEQRLGENALMEFVLKKIGIRPIGRIGEFYTERHIP | 209 |
| WP_011027247.1 | LPNTLYTRDTT CWLYGGTLNPLYWSARHDETLLMKAIYTFHPDFK-GS--KVWW----   | 213 |
| WP_012482189.1 | IPNTLFQRDPSCW IYGGVTCNPMFWPARRAETLIQRAIYKFHPFIPL-GGDFQIWW---- | 204 |
| KFL10416.1     | LPNTQFTRDTT CWIYGGVTLNPMYWPARRQETLLTTAIYKFHPFEFA-NAEFEIYW---- | 211 |
| KHL72821.1     | LPNTQFTRDTT CWIYGGVTLNPMYWPARRQETLLTTAIYKFHPQFT-GADFQVWY----  | 211 |
| AAD55448.1     | MPNLYFTRDPFASV GNGVTIHYMRYKVRQRET LFSRFVFSNHPKLV---NTPWYY---- | 204 |
| BAQ54605.1     | MPNLYFTRDPFASV GNGVTIHYMRYKVRQRET LFSRFVFSNHPKLI---NTPWYY---- | 204 |
| AGS66837.1     | MPNVLFTRDPFAS IGNGITINKMYTKVRRRETIFA EYIFKYHSAYK--ENVPIWF---- | 209 |
| NP_813907.1    | MPNLYFTRDNFATM GHGISLNHMYSVTRQRETI FGQYIFDYHPRFA-GKEVPRVY---- | 207 |
| ARW56296.1     | MPNLYFTRDPAAA IGSLTINKMKEPARRRESLF MRYIINHHPRFK-GHEIPVWL----  | 206 |
| CAA04682.1     | MPNLYFTRDPAAS MGDGLTINKMTFEARQRESMFMEVIMQHHPRFA-NQGAQVWR----  | 206 |
|                | * : * * * : * * : .                                           |     |

|                |                                                                 |     |
|----------------|-----------------------------------------------------------------|-----|
| XP_001705755.1 | ----CREGGPHCMLEGGDFVPVSPGLAMMGVGLRSTYVGAQYLYMSKDLLGTR--RF-AVV   | 268 |
| EST48861.1     | ICGGANKLTPKATIEGGDFIALNNGIGALGVGLRSSYTAGIHLMEHDLLGTD--KF-IIV    | 266 |
| WP_011027247.1 | --GDPERDWGQATFEGGDIMPVGNVGVLGMGMSERTSRQAITQV-AAALFRSG--AAEHVV   | 268 |
| WP_012482189.1 | --GDSQDPFANASMEGGDVMPIGNGTVLIGMGERTTYQAVGQV-AQALFRSK--AAKRVI    | 259 |
| KFL10416.1     | --GDPDKDHGSS TLEGGDVMPIGNGVVLIGMGERTSRQAIGQV-AQSLFAKG--AAERVI   | 266 |
| KHL72821.1     | --GDPDKDHGNATLEGGDVMPIGKIVLIGMGERTSRQAIGQL-AQNLFAGK--AVEKVI     | 266 |
| AAD55448.1     | --DPA----EGLSIEGGDVFIYNNDTLVGVVSERTDLQTITLL-AKNIKANKECEFKRIV    | 257 |
| BAQ54605.1     | --DPS----LKLSIEGGDVFIYNNDTLVGVVSERTDLQTVTLL-AKNIVANKECEFKRIV    | 257 |
| AGS66837.1     | --NRW----EETSLIEGGDEFLVNLKDLLVTIGISERTEAGSVEKL-AASLFKNK-APFSTIL | 261 |
| NP_813907.1    | --DRS----ESTRIEGGDELILSKEVVAIGISQRTDAASIEKI-ARNIFEQK-LGFKNIL    | 259 |
| ARW56296.1     | --DRD----FKFNIIEGGDELVLNEETVAIGVSERTTAQAIERL-VRNLFQRQ-SRIRRVL   | 258 |
| CAA04682.1     | --DRD----HIDRMEGGDELILSDKVLAIIGISQRTSAQSIEEL-AKVLFANH-SGFEEKIL  | 258 |
|                | : * * * . . : * . * : : :                                       |     |

|                |                                                                  |     |
|----------------|------------------------------------------------------------------|-----|
| XP_001705755.1 | KDCFDQHQRMRHLDC TFSVLHDKLVVLD DDIYI-CSGMGLRYVDEWID-VGAD--A----VK | 320 |
|----------------|------------------------------------------------------------------|-----|

|                |                                                                 |     |
|----------------|-----------------------------------------------------------------|-----|
| EST48861.1     | KDTFDQDQDRMHLDTCTCSPLHDKLILIDEEILINPDKLRYVDEWVH-LGGY--S----DE   | 319 |
| WP_011027247.1 | VAGMPKLRSAAMHLDTVFTFADRDVVTLYPRIMDAV---HTFSLRPGDRAPGFDVV--DEG   | 323 |
| WP_012482189.1 | GCLMPKSRAAMHLDTVFSFCDDRVDVTLFAEVVDQV---RCYSMPKDDD-GTFEI--HPE    | 313 |
| KFL10416.1     | VAGLPKSRAAMHLDTVFSFCDDRDLVTIFPEVVKEI---VPFSLRDPSSPYGMNI--RRE    | 321 |
| KHL72821.1     | VAGLPKSRAAMHLDTVFSFCDDRDLVTIFPEVVKEI---VPFIIRPDESKPYGMDV--RRE   | 321 |
| AAD55448.1     | AINVPKWTNLMHLDTWLTMLDKDKFLYSPIANDVF---K-FWDYDLVNG--GDAPQPVND    | 311 |
| BAQ54605.1     | AINVPKWTNLMHLDTWLTMLDKDKFLYSPIANDVF---K-FWDYDLVNG--GAEPQPVEN    | 311 |
| AGS66837.1     | AFKIPKNRAYMHLDTVFTQIDYSVFTSFTS---DD---MYFSIYVLTYSNSNKNINIKKE    | 315 |
| NP_813907.1    | AFDIGEHRKFMHLDTVFTMIDYDKFTIHPEIEGGL---V---VYSITEKADGDIQIT-KE    | 312 |
| ARW56296.1     | AVEIPKSRAFMHLDTVFTMVD RDQFTIHFAIQGPE---GDMRIFVLERGKTAD E IHT-TE | 314 |
| CAA04682.1     | AIKIPHKHAMMHLDTVFTMIDYDKFTIHPIGQAG---GMVDTYILEPGNN-DEIKI-TH     | 313 |
|                | . . . . .                                                       |     |

|                |                                                                |     |
|----------------|----------------------------------------------------------------|-----|
| XP_001705755.1 | KAKSSAVTCGNYVLAKAN-----VEFQQWLSENGYTIVRIPHEYQLAYGCNNL          | 368 |
| EST48861.1     | HKSFY-----ALNEKRTN-----IELKQYLEQSGYSIIAIPHKYQLAYGCNNL          | 362 |
| WP_011027247.1 | STPFVDVAKALGLPKLR--VVETGGDAYASERQQWDSGNNA--VAVEPGVVFTYDRNT-    | 378 |
| WP_012482189.1 | NRPMLDVVAEALDLPQLR--TVETGGNSYQAEREQWDDGNNV--VALEPGVVVAYDRNT-   | 368 |
| KFL10416.1     | EKTFLEVVAESLGLKKLR--VVETGGNSFAAEREQWDDGNNV--VCLEPGVVVGYDRNT-   | 376 |
| KHL72821.1     | NKSFIEVVGELGV-KLR--VVETGGNSFAAEREQWDDGNNV--VAVEPGVVIGYDRNT-    | 375 |
| AAD55448.1     | GLPLEDLKSIIGKKPTLIPIAGAGASQIDIERETHFDGTNY--LAVAPGIVIGYARNE-    | 368 |
| BAQ54605.1     | GLPLEGLLSIIINKPVLPIPIAGAGASQMEIERETHFDGTNY--LAIRPGVVIGYSRNE-   | 368 |
| AGS66837.1     | KAKLKDVLSEYLG-RKID-I IKCAGGDLIHGAREQWNDGANV--LAIAPGEVIAYS RNH- | 370 |
| NP_813907.1    | KDTLDNILCKYLHLDNVQ-LIRCGAGNLTAAREQWNDGSNT--LAIAPGEVVYDRNT-     | 368 |
| ARW56296.1     | EHNLEPEVLKRTLGLSDVN-LIFCGGDEIASAREQWNDGSNT--LAIAPGVVVYDRNY-    | 370 |
| CAA04682.1     | QTDLEKVL RDALEVP E L T-LIPCGGDAVVAPREQWNDGSNT--LAIAPGVVVYDRNY- | 369 |
|                | : . . : : . * *                                                |     |

|                |                                                              |     |
|----------------|--------------------------------------------------------------|-----|
| XP_001705755.1 | NLGN----NCVLSVHQPTVDFIKADPAYISYCKSNNLPNGLDLVYVPFRGITRMYGSLHC | 424 |
| EST48861.1     | HLGFTDGAHILTVHEESKLFIERHPVFKYTCQKNNIR--IVVEYVPFRSITSMYGSLHC  | 420 |
| WP_011027247.1 | -----LTNALLREARVEVTVIGAE LGRGRGGGHC                          | 408 |
| WP_012482189.1 | -----YTNTLLRKAGIEVITIRGSELGRGRGGGHC                          | 398 |
| KFL10416.1     | -----YTNTLLRKAGVEVITISASELGRGRGGGHC                          | 406 |
| KHL72821.1     | -----YTNTLLRKAGIEVITISAGELGRGRGGGHC                          | 405 |
| AAD55448.1     | -----KTNAALEAAGITVLPFRGNQLSLGMGNARC                          | 398 |
| BAQ54605.1     | -----KTNAALEAAGIKVLPFHGNQLSLGMGNARC                          | 398 |
| AGS66837.1     | -----VTNKLFEENGIKVHRI PSSELSRGRGGGPC                         | 400 |
| NP_813907.1    | -----ITNKALEEAGVKLNYIPGSELVRGRGGGPC                          | 398 |
| ARW56296.1     | -----ISNECLREQGIKVIEIPSGELSRGRGGGPC                          | 400 |
| CAA04682.1     | -----VSNEENLRQYGIKVIEVPSSELSRGRGGGPC                         | 399 |
|                | : : . : * . : *                                              |     |

|                |                                                                 |     |
|----------------|-----------------------------------------------------------------|-----|
| XP_001705755.1 | ASQVYVRTPLAPAAVKA CEQEGDGI AAIYEKNGEPVDAAGKKFD CVIYIPSSVDDLIDGL | 484 |
| EST48861.1     | ATQVLERDVP-TAAIDKCN S-----QVLNDEKLFDAALFIPTFF-----              | 458 |
| WP_011027247.1 | MTCPLVREPVD F-----                                              | 420 |
| WP_012482189.1 | MTCPIWRDPAY-----                                                | 409 |
| KFL10416.1     | MTCPIIRDPI DY-----                                              | 418 |
| KHL72821.1     | MTCPIVRDPIDY-----                                               | 417 |
| AAD55448.1     | MSMPLSRKDVK-----                                                | 409 |
| BAQ54605.1     | MSMPLSRKDVKW-----                                               | 410 |
| AGS66837.1     | MSMSLVREDI-----                                                 | 410 |
| NP_813907.1    | MSMPLYREDL-----                                                 | 408 |
| ARW56296.1     | MSMPLYREDVK-----                                                | 411 |
| CAA04682.1     | MSMPLVRRKT-----                                                 | 409 |
|                | : : *                                                           |     |

|                |                                                                 |     |
|----------------|-----------------------------------------------------------------|-----|
| XP_001705755.1 | KINLRDDAAPSREI IADAYGLYQKLVSEGRVPYITWRMPSPMPVVS LKGAA---KAGSLKA | 541 |
| EST48861.1     | -----ASKETIKEVYELYEKL RKEGKNVYLINKYKITELISFKNLNAKNVEGLLAE       | 509 |
| WP_011027247.1 | -----                                                           | 420 |
| WP_012482189.1 | -----                                                           | 409 |
| KFL10416.1     | -----                                                           | 418 |
| KHL72821.1     | -----                                                           | 417 |
| AAD55448.1     | -----                                                           | 409 |
| BAQ54605.1     | -----                                                           | 410 |
| AGS66837.1     | -----                                                           | 410 |
| NP_813907.1    | -----                                                           | 408 |
| ARW56296.1     | -----                                                           | 411 |
| CAA04682.1     | -----                                                           | 409 |

|                |                                            |     |
|----------------|--------------------------------------------|-----|
| XP_001705755.1 | VLDKIPQLTPFTP KAVEGAPAA YTRYLGLEQADI CVDIK | 580 |
| EST48861.1     | IYGSAKKHFIQPKKQDGA VTAIER-DGLSLDDILYIF-    | 546 |

|                |       |     |
|----------------|-------|-----|
| WP_011027247.1 | ----- | 420 |
| WP_012482189.1 | ----- | 409 |
| KFL10416.1     | ----- | 418 |
| KHL72821.1     | ----- | 417 |
| AAD55448.1     | ----- | 409 |
| BAQ54605.1     | ----- | 410 |
| AGS66837.1     | ----- | 410 |
| NP_813907.1    | ----- | 408 |
| ARW56296.1     | ----- | 411 |
| CAA04682.1     | ----- | 409 |

Figure S2. Multiple sequence amino acid alignment of ADI enzyme from *G. lamblia* and different organisms. The alignment was performed in the free tool Clustal, version 1.2.4. The reference sequences used are: XP\_001705755.1 Arginine deiminase [*Giardia lamblia* ATCC 50803]. EST48861.1 Arginine deiminase [*Spironucleus salmonicida*]. WP\_011027247.1 Arginine deiminase [*Streptomyces coelicolor*]. WP\_012482189.1 Arginine deiminase [*Rhizobium etli*]. KFL10416.1 Arginine deiminase [*Pseudomonas aeruginosa*]. KHL72821.1 Arginine deiminase [*Pseudomonas putida*]. AAD55448.1 Arginine deiminase [*Mycoplasma arthritidis*]. BAQ54605.1 Arginine deiminase [*Mycoplasma arginini*]. AGS66837.1 Arginine deiminase [*Borrelia burgdorferi* CA382]. NP\_813907.1 Arginine deiminase [*Enterococcus faecalis* V583]. ARW56296.1 Arginine deiminase [*Bacillus licheniformis*]. CAA04682.1 Arginine deiminase [*Lactobacillus sakei*]. Symbols: \* (asterisk) indicates positions which have a single, fully conserved residue. : (colon) indicates conservation between groups of strongly similar properties. . (period) indicates conservation between groups of weakly similar properties. – (hyphen) indicates a gap. Cysteine residues are highlighted in bold red. The C-terminal end of the protein is highlighted in bold. Residues of the catalytic site (Glu 226, His 280, and Cys 424) are highlighted in blue.
